# Supplementary material for: Assessing and Improving Biooxidation for Acid Generation and Rare Earth Element Extraction
Source: MDPI journal article supplement (doi:10.3390/pr11041005), 2023-03-26
Supplement: s1 [file s1]

# Assessing and Improving Biooxidation for Acid Generation and Rare Earth Element Extraction

Michael L. Free<sup>1</sup>, Joel Illunga<sup>1</sup>, Prasenjit Podder<sup>1</sup> and Prashant K. Sarswat<sup>1,\*</sup>

## Supporting Information

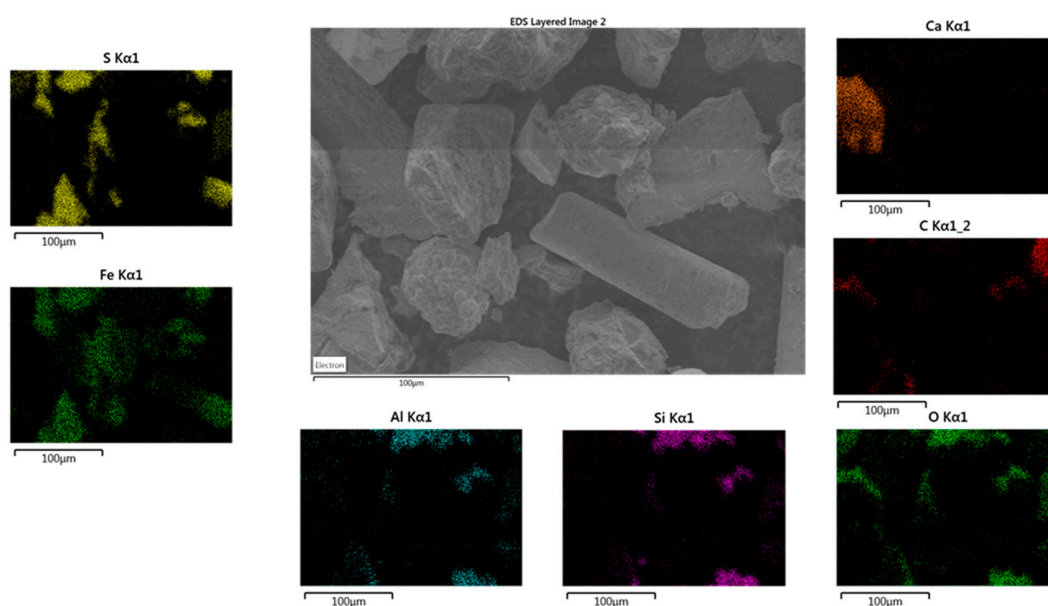

**Figure S1.** EDS mapping image of typical pyrite concentrate.

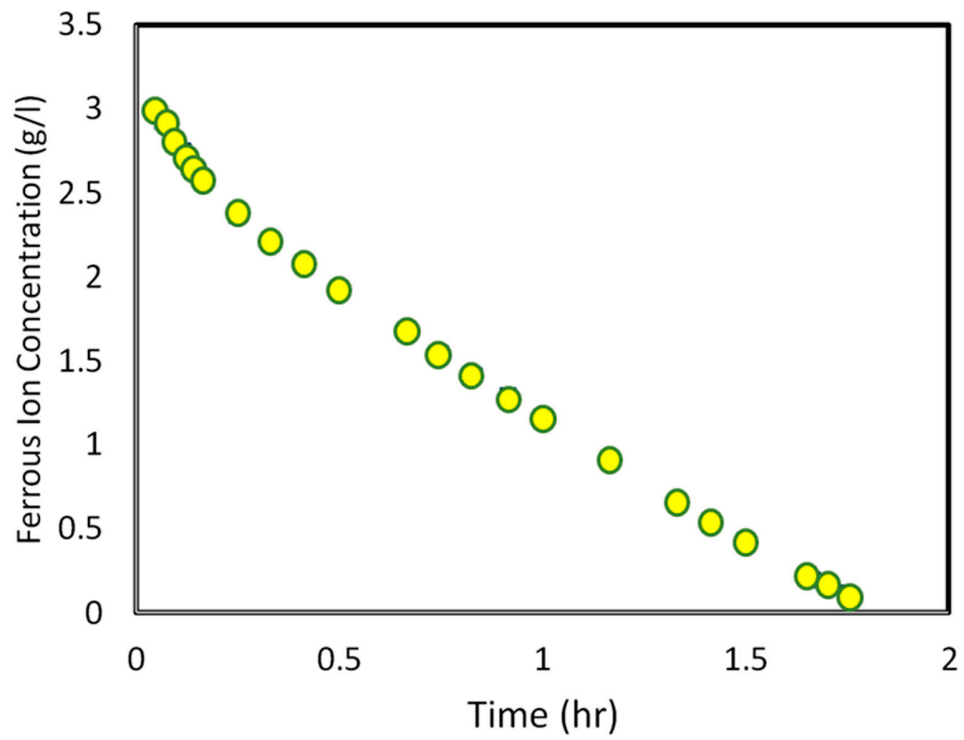

**Figure S2.** Comparison of ferrous ion concentration versus time for typical biooxidation testing in which ferrous ions were added to a solution and subsequently oxidized by bacteria.

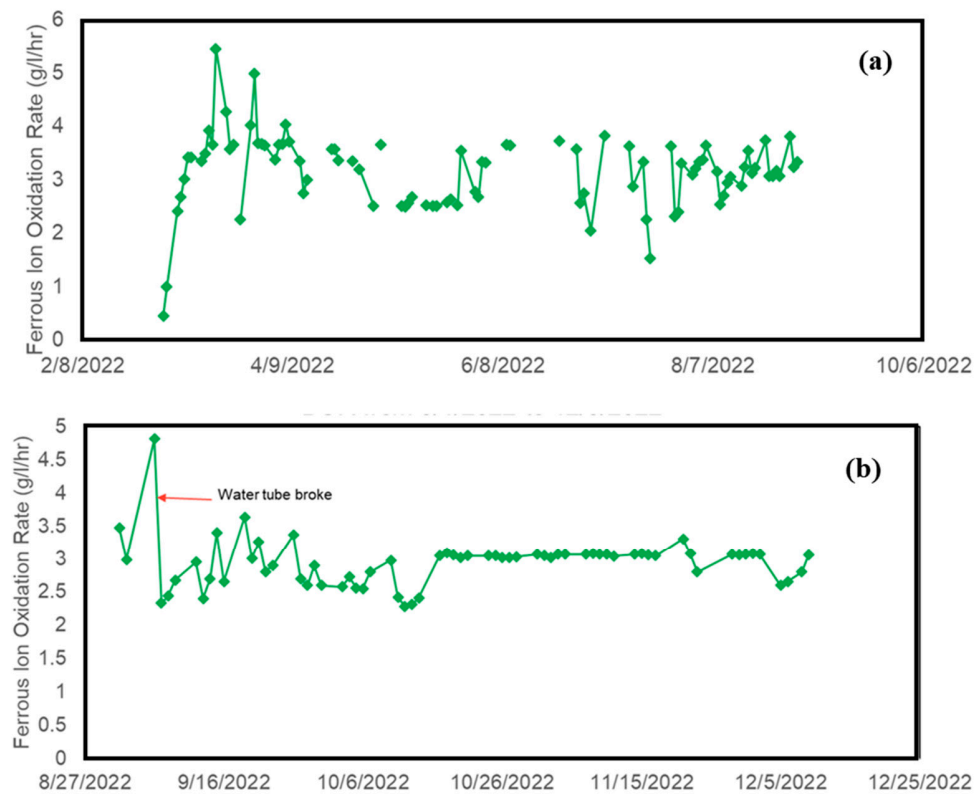

**Figure S3.** Comparison of ferrous ion oxidation rate (biooxidation rate or BOR) data in the WBB 419 bioreactor (a) from 3/3/2022 to 8/31/2022. (b) from 8/27/2022 to 12/9/2022.

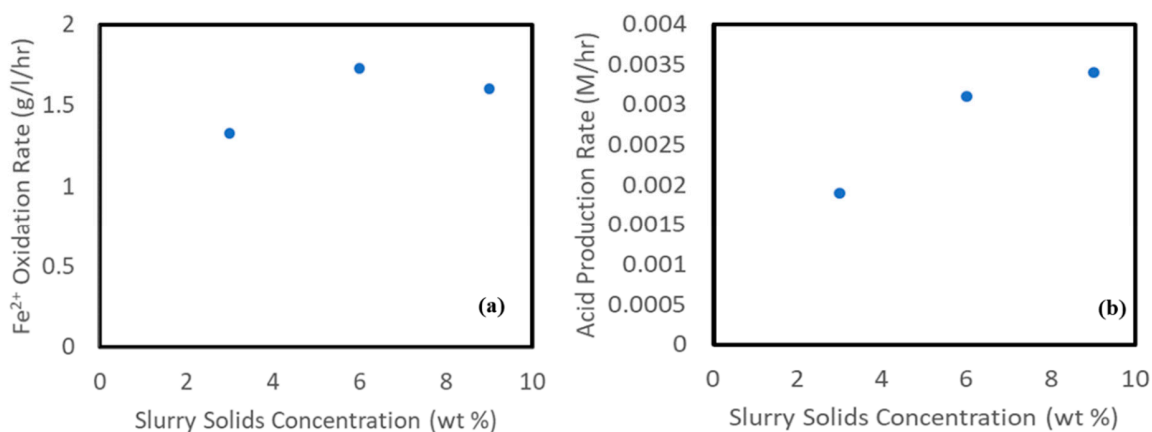

**Figure S4.** (a) Comparison of slurry solids concentration on ferrous ion oxidation rate; (b) Comparison of slurry solids concentration on acid production rate. The baseline conditions for these comparisons are 500 RPM stirring speed, 35°C, 6 wt % solids, 1.0 l/m air flow rate, 9 K medium without iron, and 6-day residence time.

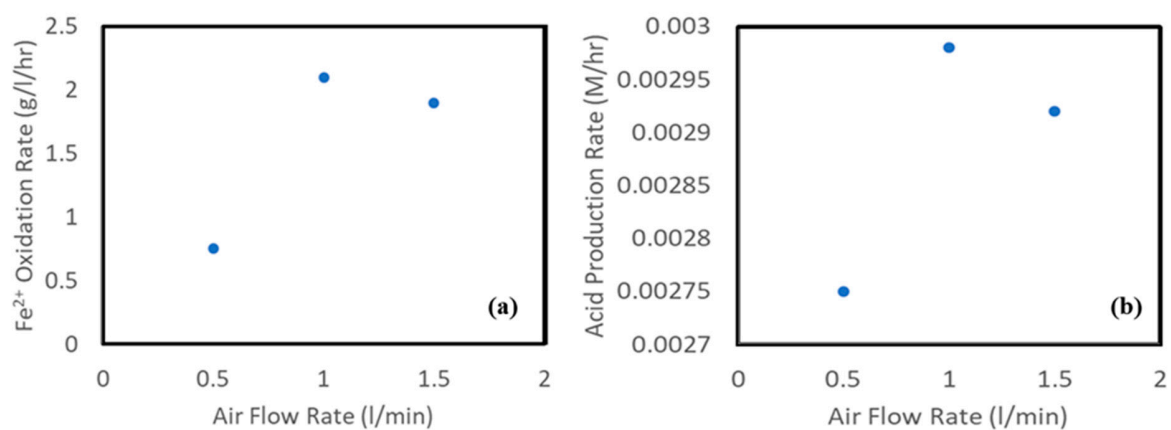

**Figure S5.** (a) Comparison of air flow rate and ferrous ion oxidation rate; (b) Comparison of air flow rate and acid production rate. The baseline conditions for these comparisons are 500 RPM stirring speed, 35°C, 6 wt % solids, 1.0 l/m air flow rate, 9 K medium without iron, and 6-day residence time.

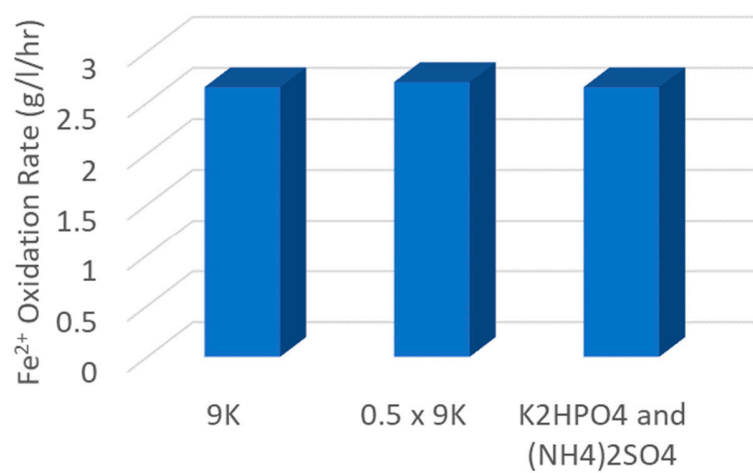

**Figure S6.** Comparison of nutrient additions on ferrous ion oxidation rate. The baseline conditions for this comparison are 500 RPM stirring speed, 35°C, 6 wt % solids, 1.0 l/m air flow rate, 9 K medium without iron, and 6-day residence time.
